# Supplementary material for: Chloro aluminum phthalocyanine-based organic thin-film transistors as cannabinoid sensors: engineering the thin film response
Source: Royal Society of Chemistry journal article supplement (doi:10.1039/d2sd00071g), 2022-01-01
Supplement: d2sd00071g1.pdf [file d2sd00071g1.pdf]

# **Chloro Aluminum Phthalocyanine-based Organic Thin-Film Transistors as Cannabinoid Sensors: Engineering the thin film response.**

Halynne R. Lamontagne<sup>1</sup>, Zachary J. Comeau<sup>1</sup>, Rosemary R. Cranston<sup>1</sup>, Nicholas T. Boileau<sup>1</sup>, Cory S. Harris<sup>2,3</sup>, Adam J. Shuhendler<sup>2,3,4\*</sup> and Benoît H. Lessard<sup>1,5\*</sup>

<sup>1</sup> *Department of Chemical and Biological Engineering, University of Ottawa, 161 Louis Pasteur, Ottawa, ON, Canada, K1N 6N5*

<sup>2</sup> *Department of Chemistry and Biomolecular Sciences, University of Ottawa, 150 Louis Pasteur, Ottawa, ON, Canada K1N 6N5*

<sup>3</sup> *Department of Biology, University of Ottawa, 30 Marie Curie, Ottawa, ON, Canada K1N 6N5*

<sup>4</sup> *University of Ottawa Heart Institute, 40 Ruskin St, Ottawa, ON, Canada K1Y 4W7*

<sup>5</sup> *School of Electrical Engineering and Computer Science, University of Ottawa, 800 King Edward Ave. Ottawa, ON, Canada, K1N 6N5*

\*Co-corresponding authors: [Adam.Shuhendler@uottawa.ca](mailto:Adam.Shuhendler@uottawa.ca) (AJS) [Benoit.Lessard@uottawa.ca](mailto:Benoit.Lessard@uottawa.ca) (BHL).

## **Supporting Information**

**Table S1.** Device characteristics of Cl-AlPc OTFTs with different device structures.

| $W/L^a)$ | Thickness <sup>a)</sup><br>[nm] | $I_{on}^b)$<br>[ $10^{-4}$ A] | $I_{on/off}^b)$ | $\mu_h^b)$<br>[ $10^{-2}$ cm <sup>2</sup> /Vs] | $H^b)$<br>[V]    | $V_T^b)$<br>[V] |
|----------|---------------------------------|-------------------------------|-----------------|------------------------------------------------|------------------|-----------------|
| 100      | 30                              | $0.38 \pm 0.04$               | $10^4$          | $2.3 \pm 0.2$                                  | $4.03 \pm 0.002$ | $-0.9 \pm 0.8$  |
|          | 50                              | $0.70 \pm 0.07$               | $10^4$          | $3.3 \pm 0.3$                                  | $7.14 \pm 0.004$ | $10.7 \pm 1.1$  |
|          | 100                             | $0.82 \pm 0.03$               | $10^3$          | $3.9 \pm 0.1$                                  | $10.42 \pm 0.67$ | $30.5 \pm 1.1$  |
| 200      | 30                              | $1.0 \pm 0.1$                 | $10^4$          | $2.6 \pm 0.1$                                  | $6.72 \pm 0.002$ | $7.2 \pm 0.7$   |
|          | 50                              | $1.9 \pm 0.2$                 | $10^4$          | $4.1 \pm 0.5$                                  | $9.29 \pm 0.82$  | $13.0 \pm 0.7$  |
|          | 100                             | $2.1 \pm 0.1$                 | $10^3$          | $5.3 \pm 0.5$                                  | $11.09 \pm 0.67$ | $33.2 \pm 0.7$  |
| 400      | 30                              | $1.8 \pm 0.4$                 | $10^4$          | $2.2 \pm 0.4$                                  | $8.74 \pm 0.78$  | $13.2 \pm 0.7$  |
|          | 50                              | $4.7 \pm 0.7$                 | $10^4$          | $5.2 \pm 0.8$                                  | $10.00 \pm 0.10$ | $15.7 \pm 0.8$  |
|          | 100                             | $6.2 \pm 0.2$                 | $10^3$          | $8.3 \pm 0.4$                                  | $11.09 \pm 0.67$ | $29.2 \pm 0.7$  |
| 800      | 30                              | $3.3 \pm 0.5$                 | $10^4$          | $1.9 \pm 0.3$                                  | $9.41 \pm 0.004$ | $12.6 \pm 1.3$  |
|          | 50                              | $13 \pm 2$                    | $10^4$          | $6.9 \pm 0.9$                                  | $11.07 \pm 0.71$ | $20.0 \pm 0.8$  |
|          | 100                             | $14 \pm 0.3$                  | $10^3$          | $9.9 \pm 0.2$                                  | $13.11 \pm 0.67$ | $31.9 \pm 0.7$  |
| 1000     | 30                              | $40 \pm 0.8$                  | $10^5$          | $43 \pm 2$                                     | $4.47 \pm 0.93$  | $-5.7 \pm 1.5$  |
|          | 50                              | $67 \pm 2$                    | $10^5$          | $71 \pm 3$                                     | $2.59 \pm 0.50$  | $-8.0 \pm 0.8$  |
|          | 100                             | $45 \pm 4$                    | $10^5$          | $57 \pm 5$                                     | $2.35 \pm 0.55$  | $-12.0 \pm 0.8$ |

<sup>a)</sup> OTFTs with following structure Si (gate), 230 nm SiO<sub>2</sub> (dielectric), ITO adhesion layer with gold source drain electrodes with different width/length ratios and different thicknesses of Cl-AlPc (semiconductor).

<sup>b)</sup> On current ( $I_{on}$ ), on and off current ratio ( $I_{on/off}$ ), hole mobility ( $\mu_h$ ), hysteresis ( $H$ ), and threshold voltage ( $V_T$ ). All values were averaged from a minimum of four devices.

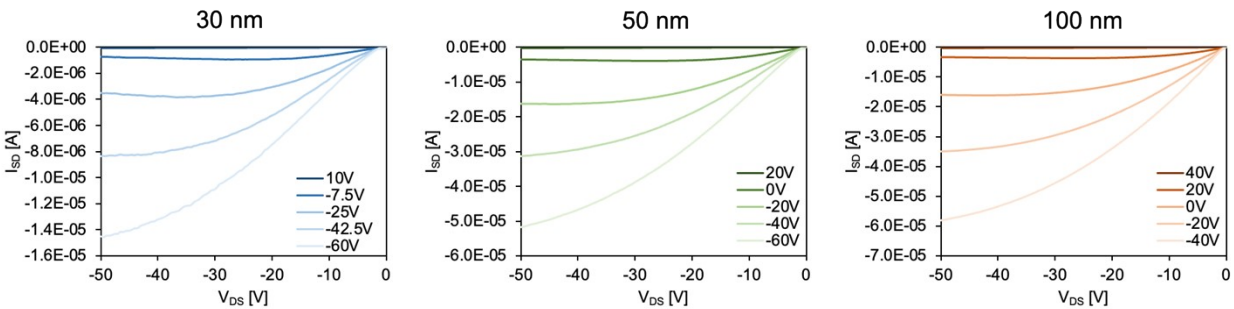

**Figure S1.** Characteristic output curves (A, B, C) were taken for the OTFTs with  $W/L = 200$  for comparison. Cl-AlPc film thickness was varied from 30 nm (A), 50 nm (B) and 100 nm (C).

**Table S2.** Two-way ANOVA analysis of pair-wise comparisons of  $W/L$  and thickness for baseline device  $I_{on}$  and  $\mu_h$  using a 95% confidence interval ( $\alpha = 0.05$ ). Significant interactions are shown in green, and non-significant interactions are shown in red.

| <b>Baseline <math>I_{on}</math></b> |                           |                            |                            |
|-------------------------------------|---------------------------|----------------------------|----------------------------|
| <b><math>W/L</math> Constant</b>    | 30 nm $\rightarrow$ 50 nm | 30 nm $\rightarrow$ 100 nm | 50 nm $\rightarrow$ 100 nm |
| $W/L = 100$                         | *                         | n.s.                       | *                          |
| $W/L = 200$                         | *                         | n.s.                       | *                          |
| $W/L = 400$                         | *                         | n.s.                       | *                          |
| $W/L = 800$                         | *                         | n.s.                       | *                          |
| $W/L = 1000$                        | *                         | n.s.                       | *                          |
| <b>Thickness Constant</b>           | 30 nm                     | 50 nm                      | 100 nm                     |
| 100 $\rightarrow$ 200               | n.s.                      | n.s.                       | n.s.                       |
| 100 $\rightarrow$ 400               | n.s.                      | n.s.                       | n.s.                       |
| 100 $\rightarrow$ 800               | *                         | *                          | *                          |
| 100 $\rightarrow$ 1000              | *                         | *                          | *                          |
| 200 $\rightarrow$ 400               | n.s.                      | n.s.                       | n.s.                       |
| 200 $\rightarrow$ 800               | n.s.                      | n.s.                       | n.s.                       |
| 200 $\rightarrow$ 1000              | *                         | *                          | *                          |
| 400 $\rightarrow$ 800               | n.s.                      | n.s.                       | n.s.                       |
| 400 $\rightarrow$ 1000              | *                         | *                          | *                          |
| 800 $\rightarrow$ 1000              | *                         | *                          | *                          |
| <b>Baseline <math>\mu_h</math></b>  |                           |                            |                            |
| <b><math>W/L</math> Constant</b>    | 30 nm $\rightarrow$ 50 nm | 30 nm $\rightarrow$ 100 nm | 50 nm $\rightarrow$ 100 nm |
| $W/L = 100$                         | *                         | *                          | n.s.                       |
| $W/L = 200$                         | *                         | *                          | n.s.                       |
| $W/L = 400$                         | *                         | *                          | n.s.                       |
| $W/L = 800$                         | *                         | *                          | n.s.                       |
| $W/L = 1000$                        | *                         | *                          | n.s.                       |
| <b>Thickness Constant</b>           | 30 nm                     | 50 nm                      | 100 nm                     |
| 100 $\rightarrow$ 200               | n.s.                      | n.s.                       | n.s.                       |
| 100 $\rightarrow$ 400               | n.s.                      | n.s.                       | n.s.                       |
| 100 $\rightarrow$ 800               | n.s.                      | n.s.                       | n.s.                       |
| 100 $\rightarrow$ 1000              | *                         | *                          | *                          |
| 200 $\rightarrow$ 400               | n.s.                      | n.s.                       | n.s.                       |
| 200 $\rightarrow$ 800               | n.s.                      | n.s.                       | n.s.                       |
| 200 $\rightarrow$ 1000              | *                         | *                          | *                          |
| 400 $\rightarrow$ 800               | n.s.                      | n.s.                       | n.s.                       |
| 400 $\rightarrow$ 1000              | *                         | *                          | *                          |
| 800 $\rightarrow$ 1000              | *                         | *                          | *                          |

\* =  $p < 0.05$ , significant

n.s. = not significant

**Table S3.** Contact resistance ( $R_C$ ) and width-normalized contact resistance ( $R_C W$ ) for OTFTs with Cl-AlPc film thickness of 30 nm, 50 nm, and 100 nm.

|                        | 30 nm      | 50 nm     | 100 nm    |
|------------------------|------------|-----------|-----------|
| $R_C$ [ $\Omega$ ]     | 43 244 000 | 3 750 000 | 1 420 400 |
| $R_C W$ [ $\Omega$ cm] | 865 000    | 75 000    | 28 400    |

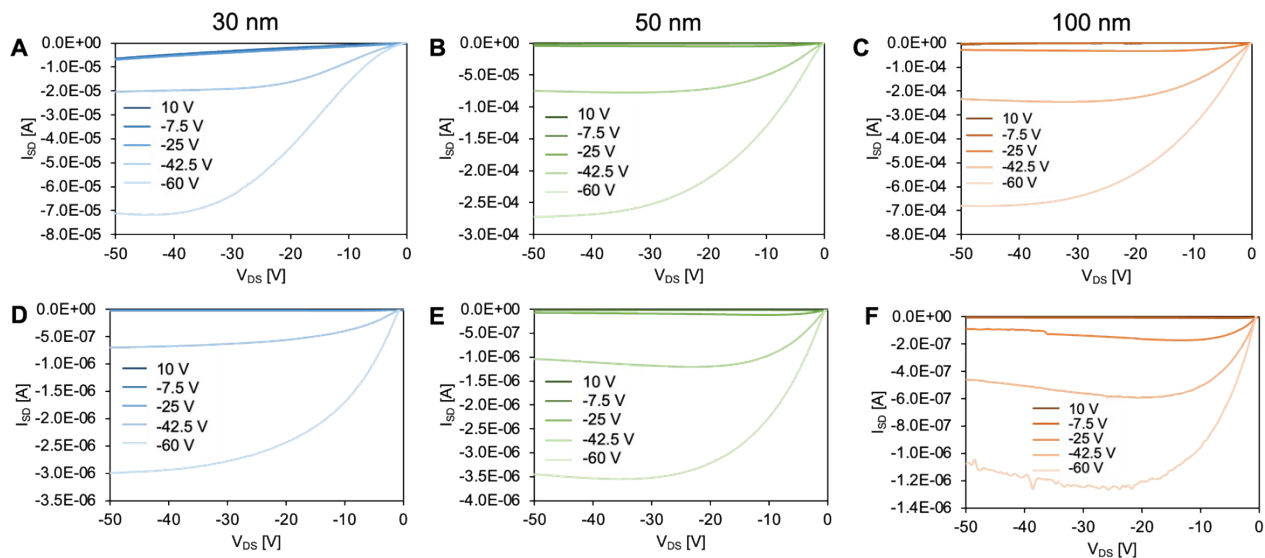

**Figure S2.** Output curves for Cl-AlPc BGBC OTFT THC sensors exposed to a THC solution (A, B, C) and to THC vapor (D, E, F). Cl-AlPc film thickness was varied from 30 nm (A, D), 50 nm (B, E) and 100 nm (C, F). As a comparison all output curves are for devices with  $W/L = 200$ .

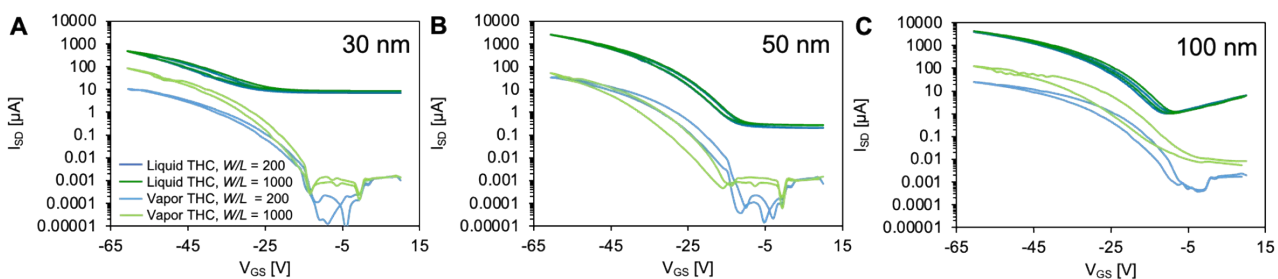

**Figure S3.** Transfer curves for Cl-AlPc BGBC OTFT THC sensors for different  $W/L$  between 200 and 1000. Cl-AlPc film thickness was varied from 30 nm (A), 50 nm (B) and 100 nm (C).

**Table S4.** Two-way ANOVA results of pair-wise comparisons of W/L and thickness for liquid THC and vapor THC-exposed devices for  $V_T$ ,  $I_{on/off}$ , and  $\mu_h$  using a 95% confidence interval ( $\alpha = 0.05$ ). Significant interactions are shown in green, and non-significant interactions are shown in red.

| <b><math>V_T</math> – Liquid THC</b>        |               |                |                |
|---------------------------------------------|---------------|----------------|----------------|
| <b>W/L Constant</b>                         | 30 nm → 50 nm | 30 nm → 100 nm | 50 nm → 100 nm |
| $W/L = 200$                                 | *             | *              | n.s.           |
| $W/L = 1000$                                | *             | *              | n.s.           |
| <b>Thickness Constant</b>                   | 30 nm         | 50 nm          | 100 nm         |
| 200 → 1000                                  | n.s.          | n.s.           | n.s.           |
| <b><math>V_T</math> – Vapor THC</b>         |               |                |                |
| <b>W/L Constant</b>                         | 30 nm → 50 nm | 30 nm → 100 nm | 50 nm → 100 nm |
| $W/L = 200$                                 | *             | *              | *              |
| $W/L = 1000$                                | *             | *              | *              |
| <b>Thickness Constant</b>                   | 30 nm         | 50 nm          | 100 nm         |
| 200 → 1000                                  | *             | *              | *              |
| <b><math>I_{on/off}</math> – Liquid THC</b> |               |                |                |
| <b>W/L Constant</b>                         | 30 nm → 50 nm | 30 nm → 100 nm | 50 nm → 100 nm |
| $W/L = 200$                                 | *             | *              | n.s.           |
| $W/L = 1000$                                | *             | *              | n.s.           |
| <b>Thickness Constant</b>                   | 30 nm         | 50 nm          | 100 nm         |
| 200 → 1000                                  | *             | *              | *              |
| <b><math>I_{on/off}</math> – Vapor THC</b>  |               |                |                |
| <b>W/L Constant</b>                         | 30 nm → 50 nm | 30 nm → 100 nm | 50 nm → 100 nm |
| $W/L = 200$                                 | n.s.          | *              | *              |
| $W/L = 1000$                                | n.s.          | *              | *              |
| <b>Thickness Constant</b>                   | 30 nm         | 50 nm          | 100 nm         |
| 200 → 1000                                  | *             | *              | *              |
| <b>Mobility – Liquid THC</b>                |               |                |                |
| <b>W/L Constant</b>                         | 30 nm → 50 nm | 30 nm → 100 nm | 50 nm → 100 nm |
| $W/L = 200$                                 | *             | *              | n.s.           |
| $W/L = 1000$                                | *             | *              | n.s.           |
| <b>Thickness Constant</b>                   | 30 nm         | 50 nm          | 100 nm         |
| 200 → 1000                                  | n.s.          | n.s.           | n.s.           |
| <b>Mobility – Vapor THC</b>                 |               |                |                |
| <b>W/L Constant</b>                         | 30 nm → 50 nm | 30 nm → 100 nm | 50 nm → 100 nm |
| $W/L = 200$                                 | n.s.          | *              | *              |
| $W/L = 1000$                                | n.s.          | *              | *              |
| <b>Thickness Constant</b>                   | 30 nm         | 50 nm          | 100 nm         |
| 200 → 1000                                  | *             | *              | *              |

\* =  $p < 0.05$ , significant

n.s. = not significant

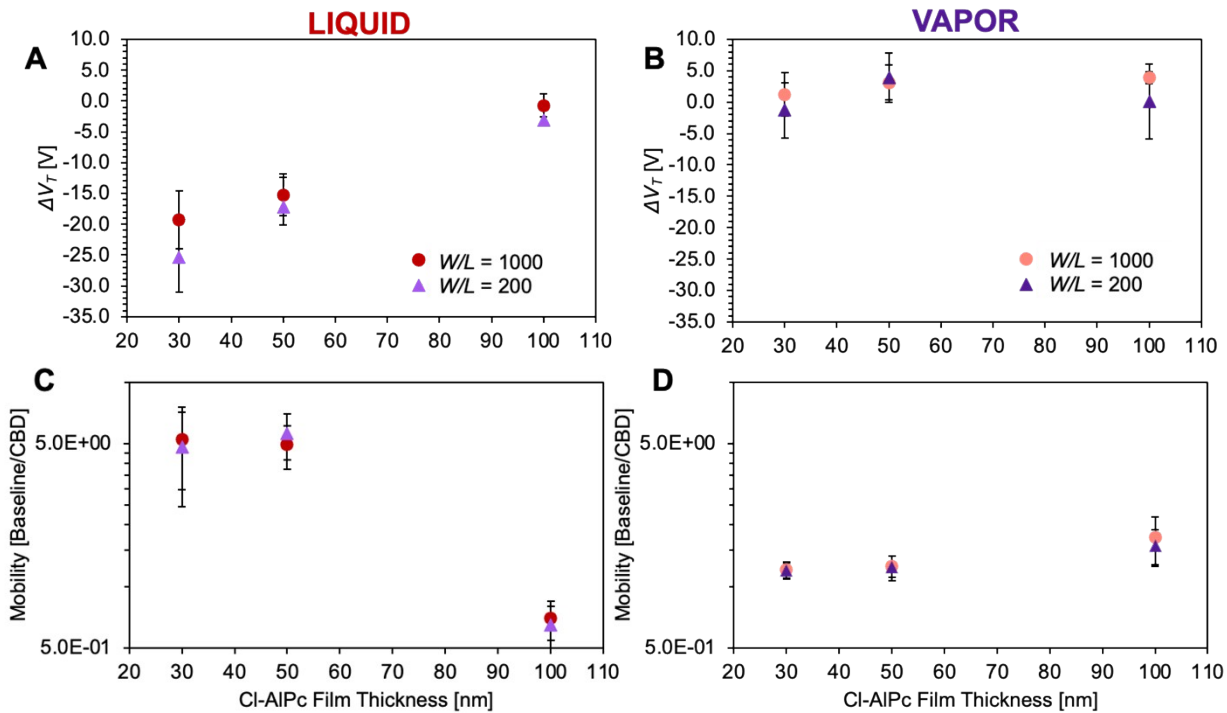

**Figure S4.** CI-AIPc OTFT based sensor characteristics when exposed to CBD solution (A, C), and CBD vapor (B, D). The device performance changes are reported different from the baseline device and the exposed device for  $V_T$  (A, B), and a ratio from the baseline and the exposed device for mobility (C, D). Points represent the means of a minimum of 4 devices and error bars represent standard deviation.

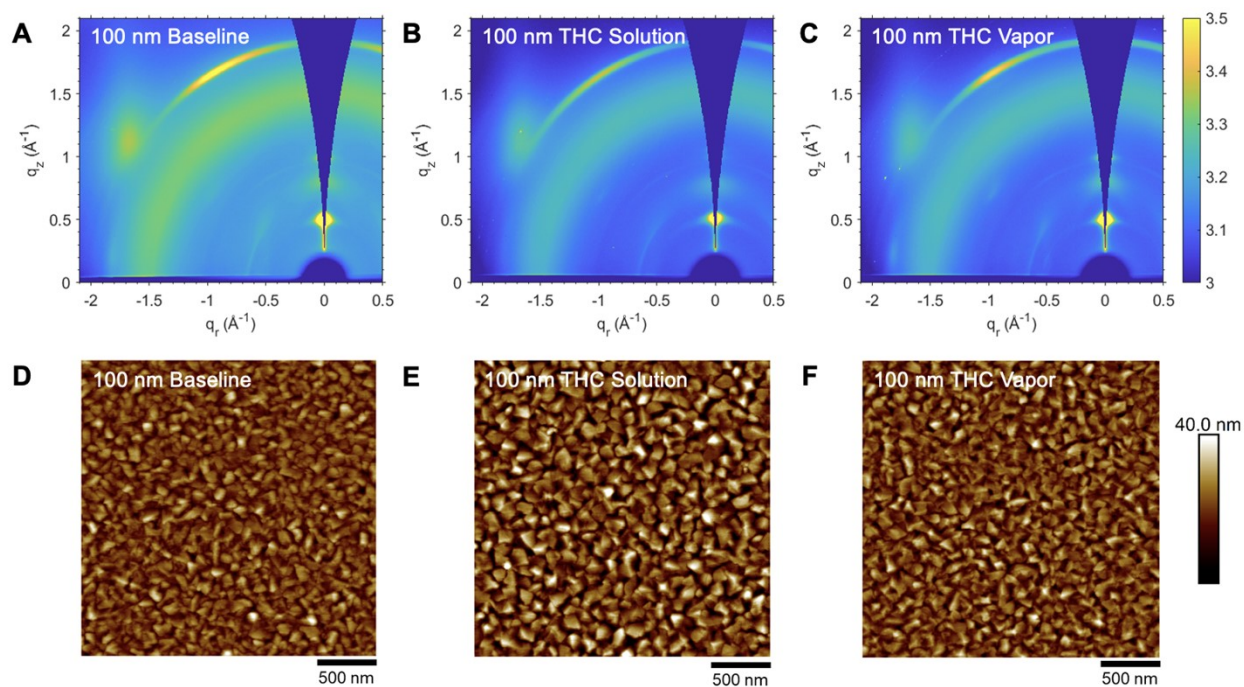

**Figure S5.** 2D scattering patterns ( $\theta = 0.3^\circ$ ) of (A) unexposed baseline, (B) THC solution exposed, and (C) THC vapor exposed 100 nm thick Cl-AIPc. AFM images of (D) unexposed baseline (RMS = 5.06 nm), (E) THC solution exposed (RMS = 7.58 nm), and (F) THC vapor exposed (RMS = 5.26 nm) 100 nm thick Cl-AIPc with scale bars of 500 nm.

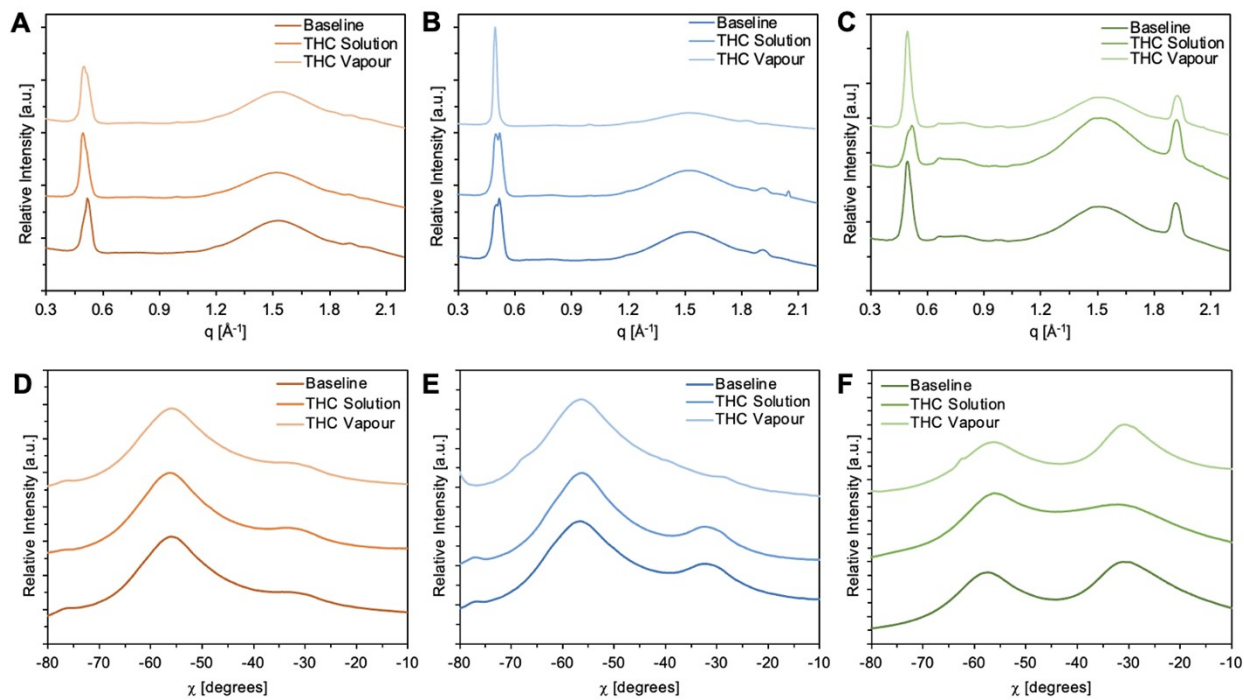

**Figure S6.** Diffraction patterns (A, B, C) and linecut profiles with respect to  $\chi$  between a  $q$  of 1.9-2.1  $\text{\AA}^{-1}$  (D, E, F) of 30 nm (A, D), 50 nm (B, E) and 100 nm (C, F) thick Cl-AlPc exposed to THC solution and vapor.
